# Supplementary material for: Rifaximin or Saccharomyces boulardii in heart failure with reduced ejection fraction: Results from the randomized GutHeart trial
Source: PubMed Central journal article supplement — eBioMedicine. 2021 Jul 28;70:103511. doi: 10.1016/j.ebiom.2021.103511 (PMC8339250; doi:10.1016/j.ebiom.2021.103511), 2021-07-28
Supplement: mmc5.pdf [file mmc5.pdf]

## Consent for Acknowledgments

Manuscript Title: **Rifaximin or Saccharomyces boulardii in Heart Failure with Reduced Ejection Fraction: Results from the Randomized GutHeart Trial.**

Corresponding author: Ayodeji Awoyemi

Article type: Original research paper

### Person or entity being acknowledged to fill in items below:

I have seen a version of the manuscript to be submitted/published and I hereby give my consent for my name (or name of entity) to be included in the acknowledgement section in the above-named manuscript for consideration of publication in the *EBioMedicine*. I understand that this signed form will be submitted to the journal with the manuscript as evidence of my consent.

I understand that this manuscript may be published in the *EBioMedicine* and in products derived from the journals. As a result, I understand that the material may be seen by the general public. I understand that I may revoke consent at any time before publication, but once the information has been published revocation of the consent is no longer possible. I understand that I will derive no financial benefit from publication of this paper.

Harald Arnesen on behalf of the safety committee.

\_\_\_\_\_  
Name of Person (print name) and/or Entity (print  
entity name and name of person signing )



\_\_\_\_\_  
Signature (or signature of the person giving  
consent on behalf of the person)

\_\_\_\_\_  
Date 02.07.2021

Only complete this section if you are not the person. What is your relationship? (The person giving consent should be a substitute decision maker or legal guardian or should hold power of attorney for the person or entity.)

\_\_\_\_\_  
Why is the person not able to give consent? (e.g., is the person a minor, incapacitated, or deceased?)
