# Supplementary material for: Rifaximin or Saccharomyces boulardii in heart failure with reduced ejection fraction: Results from the randomized GutHeart trial
Source: PubMed Central journal article supplement — eBioMedicine. 2021 Jul 28;70:103511. doi: 10.1016/j.ebiom.2021.103511 (PMC8339250; doi:10.1016/j.ebiom.2021.103511), 2021-07-28
Supplement: mmc6.pdf [file mmc6.pdf]

## Consent for Acknowledgments

Manuscript Title: **Rifaximin or Saccharomyces boulardii in Heart Failure with Reduced Ejection Fraction: Results from the Randomized GutHeart Trial.**

Corresponding author: Ayodeji Awoyemi

Article type: Original research paper

### Person or entity being acknowledged to fill in items below:

I have seen a version of the manuscript to be submitted/published and I hereby give my consent for my name (or name of entity) to be included in the acknowledgement section in the above-named manuscript for consideration of publication in the *EBioMedicine*. I understand that this signed form will be submitted to the journal with the manuscript as evidence of my consent.

I understand that this manuscript may be published in the *EBioMedicine* and in products derived from the journals. As a result, I understand that the material may be seen by the general public. I understand that I may revoke consent at any time before publication, but once the information has been published revocation of the consent is no longer possible. I understand that I will derive no financial benefit from publication of this paper.

LINN E. FOSSHAUG

Name of Person (print name) and/or Entity (print entity name and name of person signing )

Linn E. Fosshaug  
Signature (or signature of the person giving consent on behalf of the person)

02.07.21  
Date

Only complete this section if you are not the person. What is your relationship? (The person giving consent should be a substitute decision maker or legal guardian or should hold power of attorney for the person or entity.)

Why is the person not able to give consent? (e.g., is the person a minor, incapacitated, or deceased?)
